# Supplementary material
Source: bioRxiv or medRxiv preprint supplement (https://medrxiv.org/highwire/filestream/97106/field_highwire_adjunct_files/2/2020.09.15.20192765-3.pdf)
Supplement: Supplementary file [file 2020.09.15.20192765-3.pdf]

Supplemental Figure 3

IgM

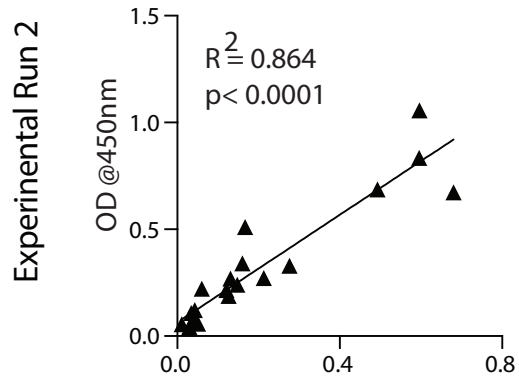

IgG

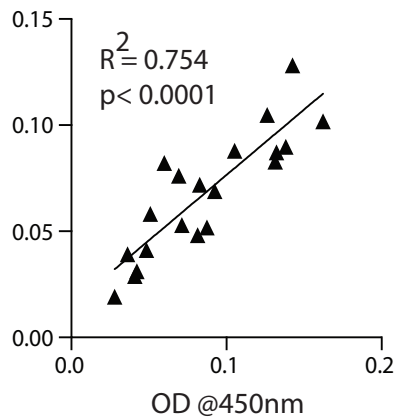

IgA

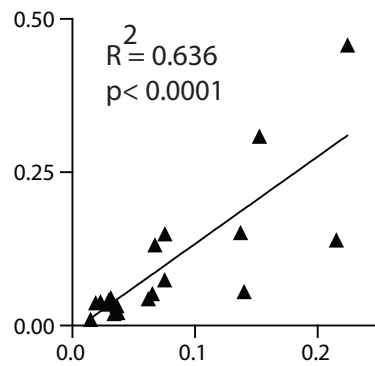

Experimental Run 1
